# Supplementary material for: Porous calcium silicate bioactive material–alginate composite for bone regeneration
Source: Royal Society of Chemistry journal article supplement (doi:10.1039/d4ra02763a), 2024-01-01
Supplement: d4ra02763a1.pdf [file d4ra02763a1.pdf]

## Supporting Information

### Porous calcium silicate bioactive material-alginate composite for bone regeneration application

Shital S. Shendage,<sup>a</sup> Kranti Kachare,<sup>a</sup> Kajal Gaikwad,<sup>b</sup> Shivaji Kashte,<sup>b</sup> Anil Vithal Ghule<sup>a\*</sup>

<sup>a</sup>Green Nanotechnology Laboratory, Department of Chemistry, Shivaji University, Kolhapur 416004, India

<sup>b</sup>Department of Stem Cell and Regenerative Medicine, Centre for Interdisciplinary Research, D. Y. Patil Education Society (Institution Deemed to Be University), Kolhapur, India

\*Author for correspondence: Anil Vithal Ghule; avg\_chem@unishivaji.ac.in

**Supporting Information.** (3 pages) is available from the RSC Online Library or the author.

**Fig. S1** TGA thermogram of 1% BM-Alg (red curve), 3% BM-Alg (black curve), and 5% BM-Alg (purple curve) composite.

**Fig. S2** BET (surface area analysis) and BJH (pore size distribution) of a) 1% (red curve), b) 3% (black curve), c) 5% (purple curve) BM-Alg, and d) 1% BM-Alg 700 °C (blue curve).

**Fig. S3** a) XPS survey spectrum and b) TEM images of 1% BM-Alg 700 °C.

**Fig. S4** Plausible mechanism and nature of bonding in the composite.

**Table S1.** Lethality assay using brine shrimp.

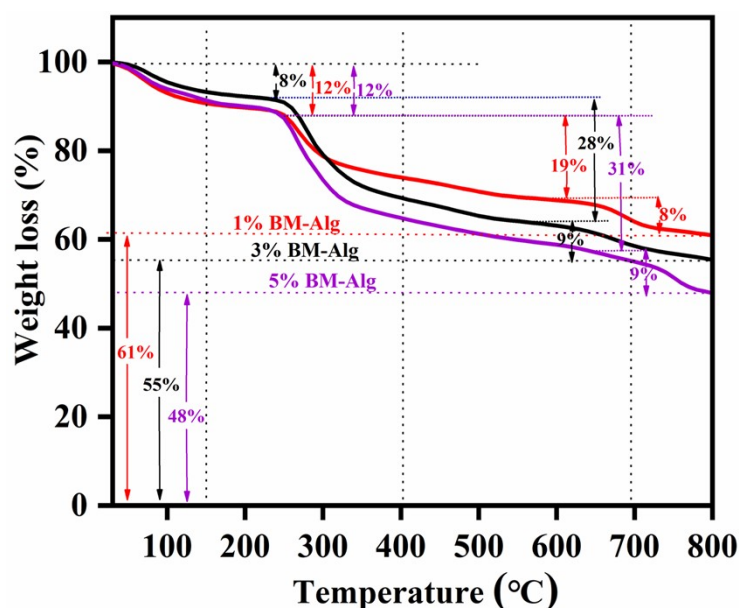

**Fig. S1** TGA thermograms of 1% BM-Alg (red curve), 3% BM-Alg (black curve), and 5% BM-Alg (purple curve) composite.

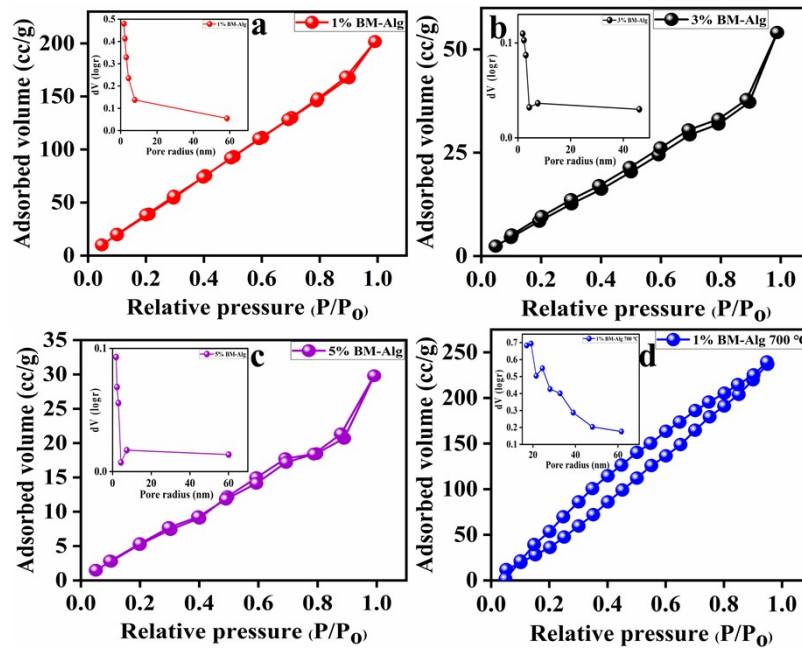

**Fig. S2** BET (surface area analysis) and BJH (pore size distribution) of a) 1% (red curve), b) 3% (black curve), c) 5% (purple curve) BM-Alg, and d) 1% BM-Alg 700 °C (blue curve).

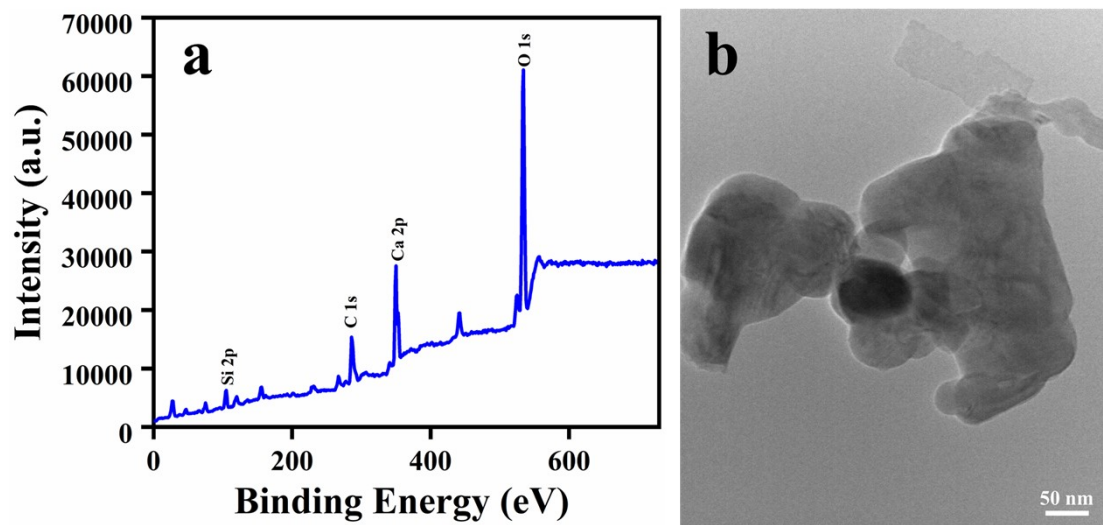

**Fig. S3** a) XPS survey spectrum and b) TEM images of 1% BM-Alg 700 °C.

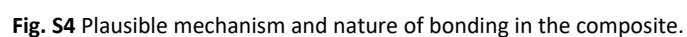

| Sr. No. | Sample name      | Concentration of sample | Shrimp Survived |    |    | Total number of shrimp used | The number of shrimp survived | Percentage mortality |
|---------|------------------|-------------------------|-----------------|----|----|-----------------------------|-------------------------------|----------------------|
|         |                  |                         | T1              | T2 | T3 |                             |                               |                      |
| 1.      | Control          | -                       | 10              | 10 | 10 | 30                          | 30                            | 00                   |
| 2.      | 1% BM-Alg        | 10 µg                   | 09              | 09 | 08 | 30                          | 26                            | 13.33                |
|         |                  | 100 µg                  | 08              | 07 | 08 | 30                          | 23                            | 23.33                |
|         |                  | 1000 µg                 | 06              | 06 | 07 | 30                          | 19                            | 36.66                |
| 3.      | 1% BM-Alg 700 °C | 10 µg                   | 09              | 10 | 09 | 30                          | 28                            | 3.33                 |
|         |                  | 100 µg                  | 08              | 07 | 09 | 30                          | 24                            | 26.66                |
|         |                  | 1000 µg                 | 06              | 07 | 06 | 30                          | 19                            | 36.66                |
